# Supplementary material
Source: PubMed Central journal article supplement (PMC4036567)
Supplement: supp_tpc.114.124586_tpc124586_Supplemental.pdf [file supp_tpc.114.124586_tpc124586_Supplemental.pdf]

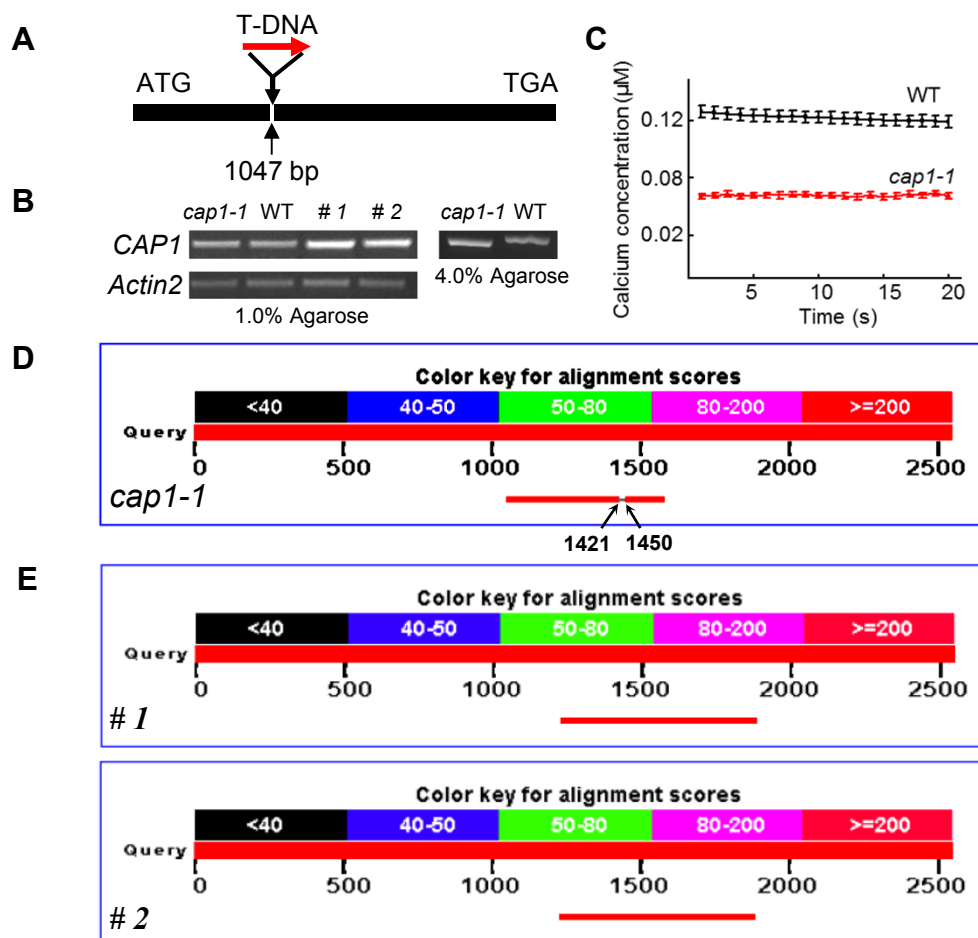

**Supplemental Figure 1 online.** The *CAP1* T-DNA insertion mutant has a lower cytoplasmic calcium concentration and BLAST results of *cap1-1* and over-expression transcripts. **(A)** Location of T-DNA insertion. The structure of *CAP1* is shown schematically; this gene has no intron. The vertical arrow indicates the T-DNA insertion site in the mutant lines. **(B)** RT-PCR analysis of *CAP1* expression in T-DNA insertion mutant and over-expression lines (#1 and #2). *CAP1* cDNA was amplified (~650 bp) for 35 PCR cycles; the positive control *Actin2* was amplified with 24 PCR cycles, and amplified fragments were separated on a 1.0% agarose gel (left panel). Smaller amplified fragments (~250 bp) of *CAP1* across the deletion region were separated on the 4% agarose gel (right panel). WT transcripts display relatively slower mobility. Three biological replicates showed the same results. **(C)** Resting  $[\text{Ca}^{2+}]_{\text{cyt}}$  in seedlings. Values were averaged and plotted (WT = 31; *cap1* = 21). **(D)** Sequence BLAST (<http://blast.ncbi.nlm.nih.gov/Blast.cgi>) of cDNA fragments derived from *cap1-1*. A sequence deletion from 1422 bp to 1449 bp occurred in the mutant. Query seq = WT *CAP1* cDNA sequence. **(E)** Sequence BLAST of cDNA fragment derived from the two over-expression lines (#1 and #2). The deletion has been rescued in these lines.

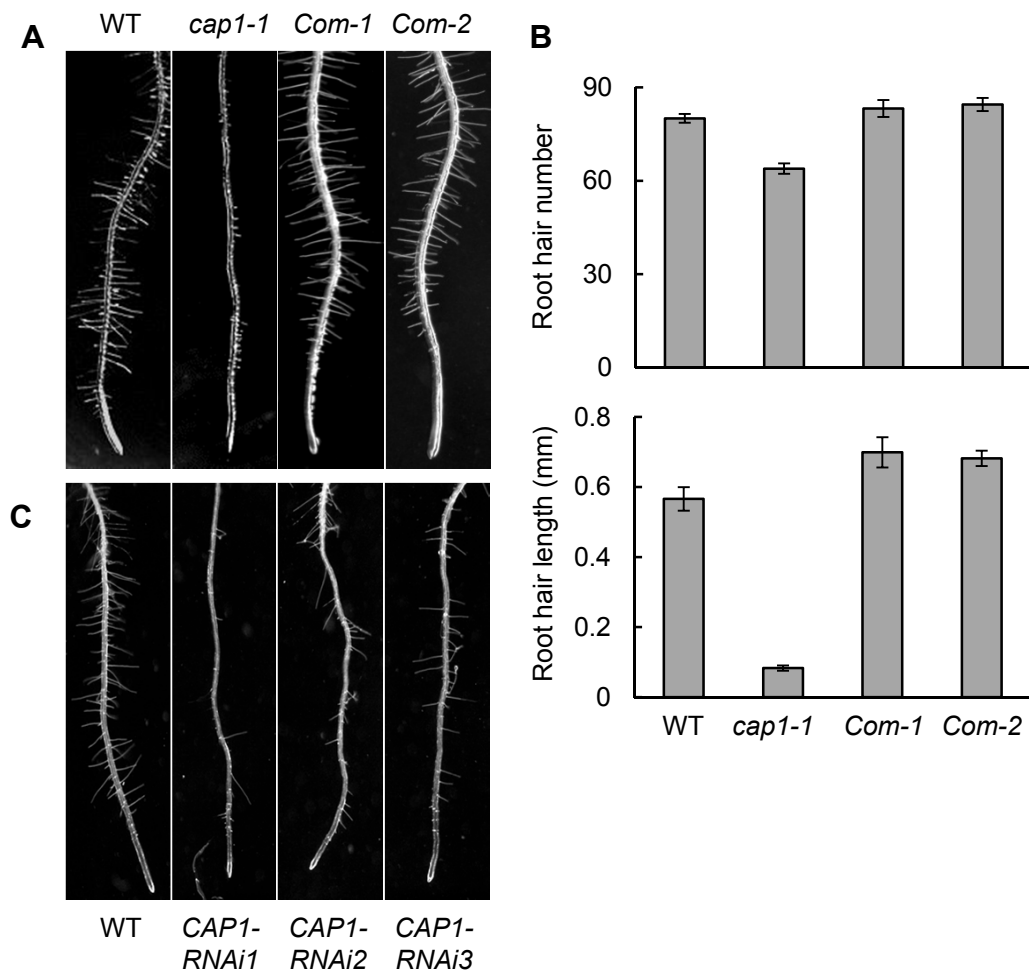

**Supplemental Figure 2 online. Root hair phenotype was complemented by *CAP1* driven by the wild-type promoter in mutants and suppression of *CAP1* expression in *Arabidopsis* RNAi knock-down lines. (A) WT, *cap1-1*, and complementation lines (*Com-1* and *Com-2*, mutant *cap1-1* transformed with *CAP1* driven by the WT promoter) grow vertically on 1.2% MS medium for 7 d. Root hairs were recovered in both transformation lines. (B) Lengths and numbers of root hairs; means  $\pm$  SE are indicated ( $n = 100$  root hairs for WT and *cap1-1*;  $n = 60$  for the *Com-1* and *Com-2* lines). (C) *CAP1*-silenced *Arabidopsis* roots at 7 d post germination.**

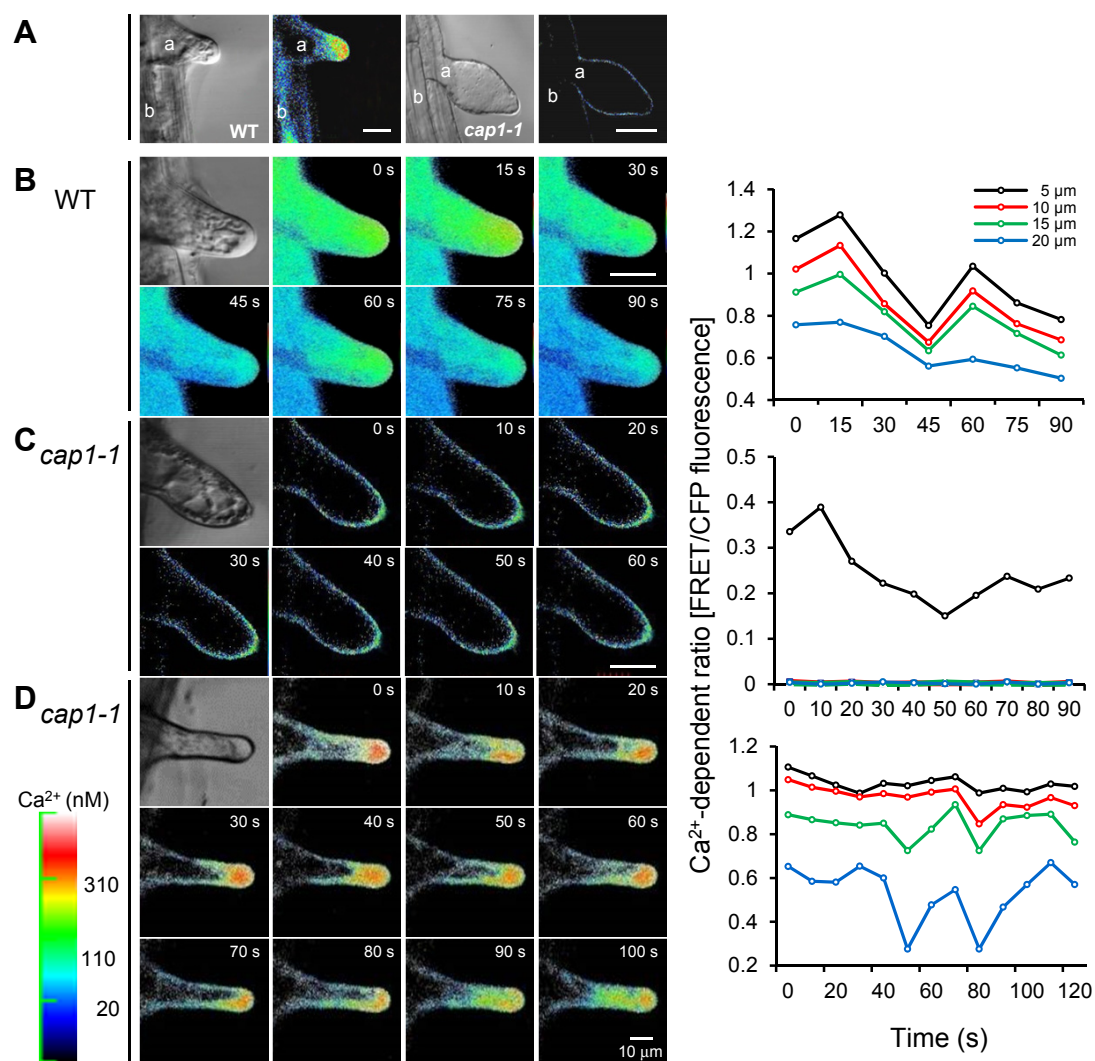

**Supplemental Figure 3 online. FRET-based YC3.6 shows levels of  $[Ca^{2+}]_{cyt}$  and oscillation of tip-focused  $Ca^{2+}$  gradients only in wild-type root hairs. (A)** Cytosolic  $Ca^{2+}$  levels of root hair cells (a) and their adjacent epidermal cells (b) in WT and *cap1-1*. Tip-focused  $Ca^{2+}$  gradients oscillated in growing WT root hairs (B), but no oscillation was detected in *cap1-1* root hairs (C). Cytosolic  $Ca^{2+}$  levels were pseudocolor-coded according to the scale at the left. Images were taken every 15 s for WT and every 10 s for *cap1-1*. (D) The  $Ca^{2+}$  gradient and oscillation in root tips were recovered in *cap1* when seedlings were grown in ammonium-deficient medium. Quantitative analysis of cytosolic  $Ca^{2+}$  oscillations in the root hair is shown on the right of each panel.  $Ca^{2+}$  levels were measured in  $10 \mu m^2$  regions of interest along the root hair length. An increase in the FRET/CFP ratio reflects an increase in cytoplasmic  $Ca^{2+}$  level. Bars =  $10 \mu m$ .

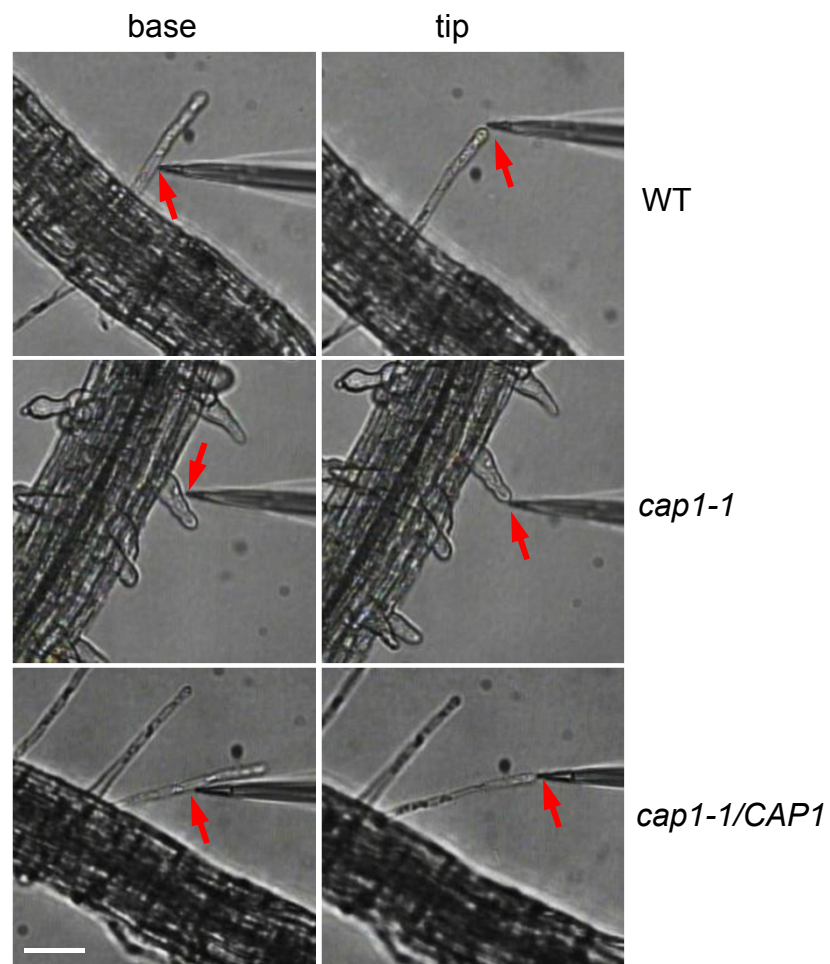

**Supplemental Figure 4 online. Ion-selective vibration microelectrode recording of  $\text{Ca}^{2+}$  fluxes at root hairs surfaces in 7-d-old seedlings. Red arrows show the positions corresponding to the root hair apex (tip) and below the hair's midpoint (base). Bar = 50  $\mu\text{m}$ .**

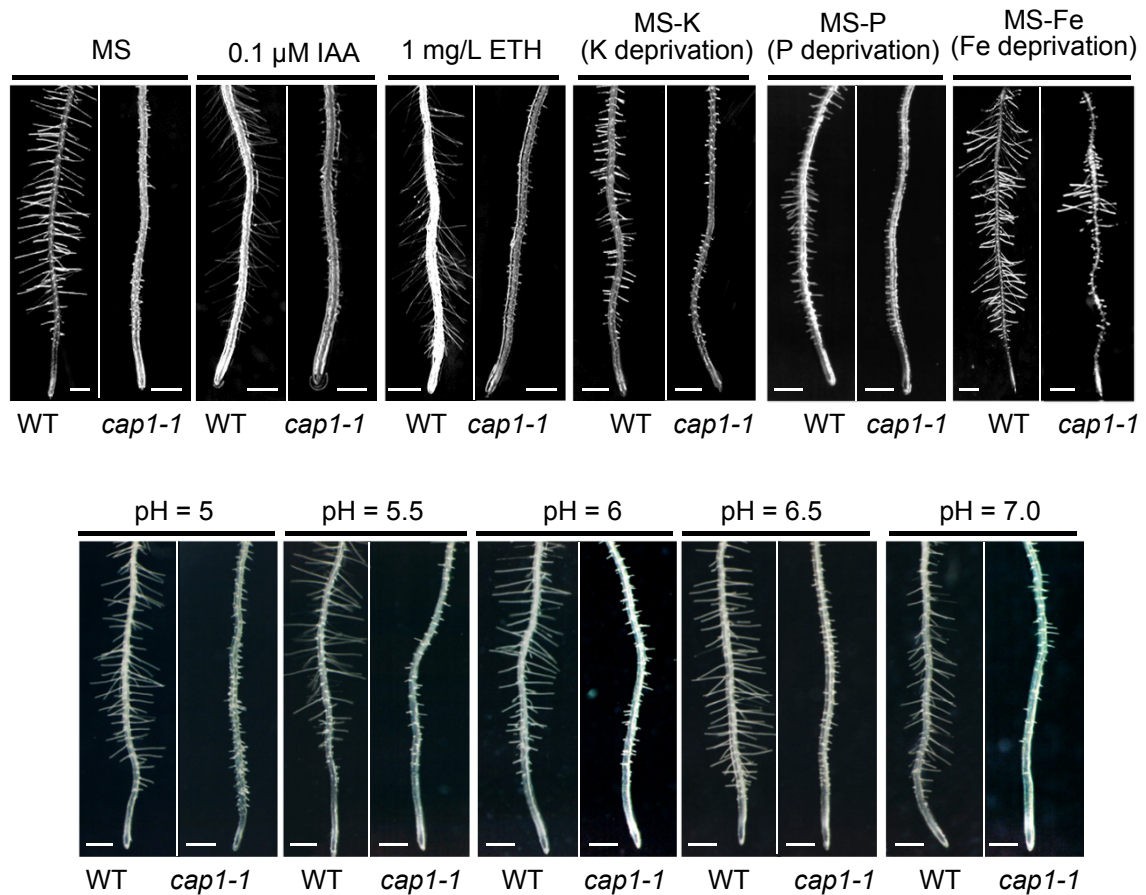

**Supplemental Figure 5 online. Effects of auxin (IAA), ethylene (ETH), various nutrients, and pH on the growth of root hairs in wild-type and *cap1-1* plants.** Seedlings were grown on the indicated medium for 7 d. Representatives of 30 seedlings for each genotype on different media in three separate experiments are presented. Bars = 0.5 mm.

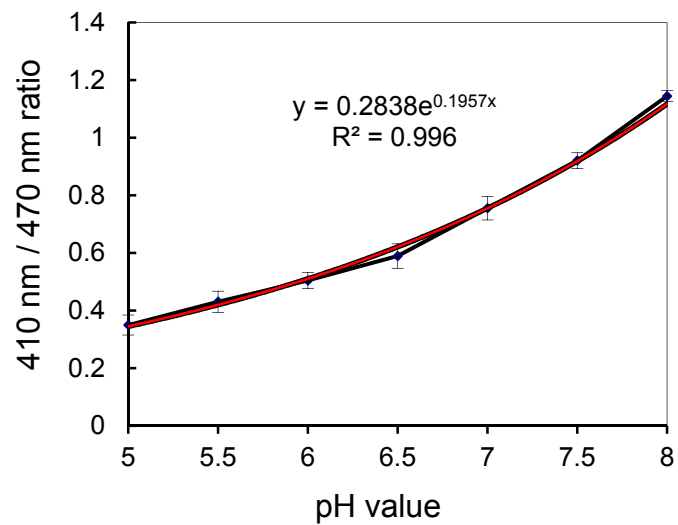

**Supplemental Figure 6 online. Standard curve of the calibrated 410 nm/470 nm ratio in different pH solutions.** Black line indicates the standard calibration curve, and red line is the trendline generated by Microsoft Excel. Root hair cells of *Arabidopsis* were used, bars represent means  $\pm$  SE (n = 6).

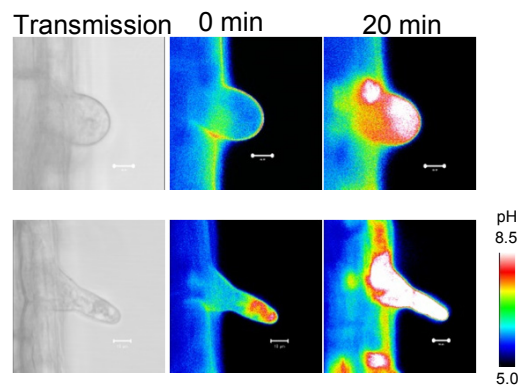

**Supplemental Figure 7 online. High levels of  $\text{NH}_4^+$  enhances root hair  $\text{pH}_c$ .** Fluorescence was monitored before and 20 min after 100 mM  $\text{NH}_4^+$  was added to WT root hairs. Representative figures are shown ( $n = 6$ ). Bars = 10  $\mu\text{m}$ .

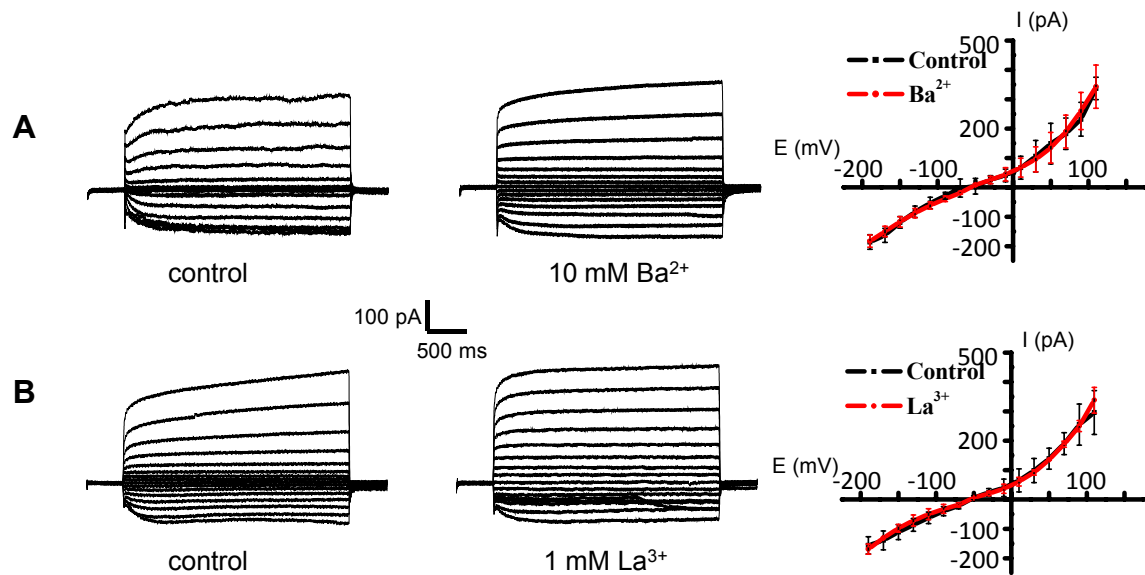

**Supplemental Figure 8 online. Characterization of ammonium current recording on the whole-cell model using Ba<sup>2+</sup> and La<sup>3+</sup>.** (A) Typical time-dependent currents recorded in WT root hair cell protoplasts in normal bathing solution (left, control) and bathing solution with 10 mM Ba<sup>2+</sup> (middle) and the current-voltage relationships for the control (n = 4) and 10 mM Ba<sup>2+</sup> (n = 5) in the bathing solutions (*I-V* curve, right) are shown. *I-V* curves plot means  $\pm$  SE. (B) The calcium-channel inhibitor La<sup>3+</sup> (1 mM) showed no influence on the current. WT root hair protoplasts were used. Control, n = 6; La<sup>3+</sup>-treated, n = 5.



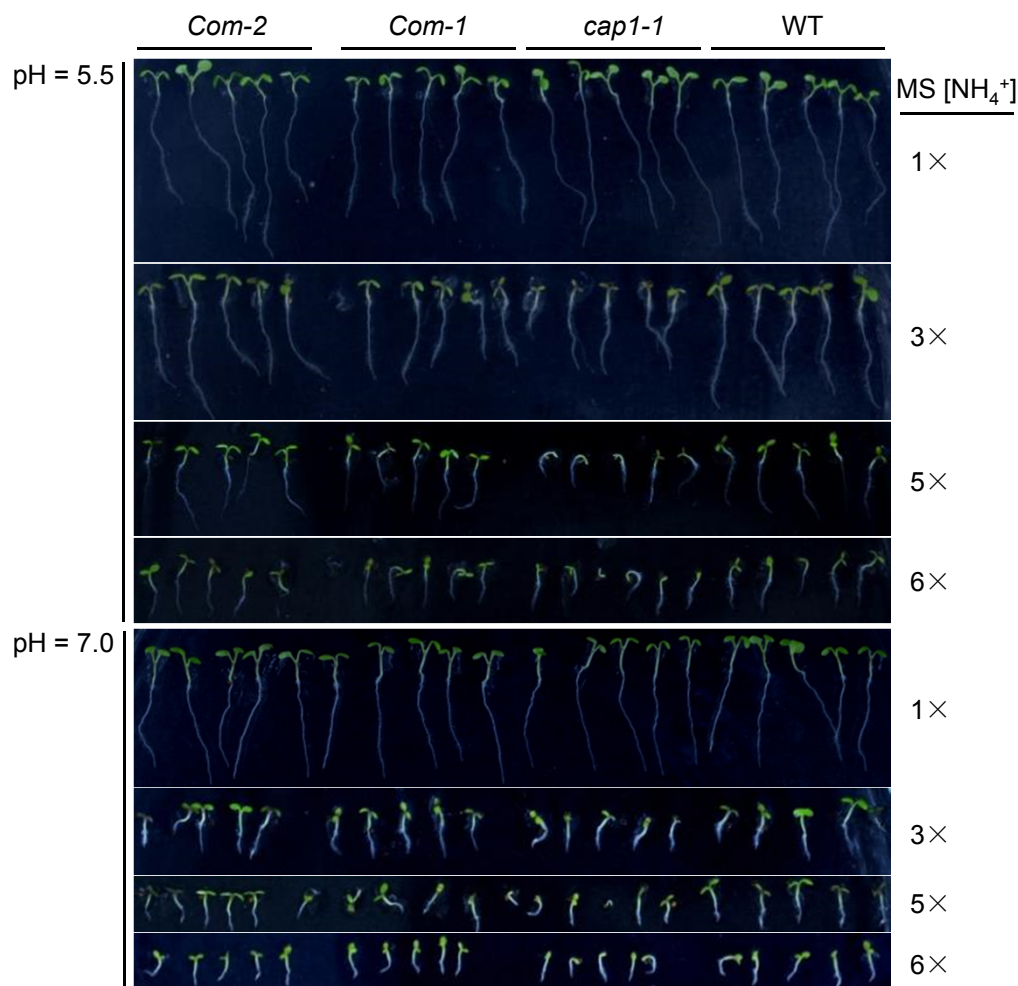

**Supplemental Figure 9 online. *cap1-1* was more sensitive to high levels of ammonium than WT and the complementary lines. WT, *cap1-1*, and two complementary lines (*com-1*, 2) were sown on media with increasing ammonium ( $\text{NH}_4\text{Cl}$ ) levels (MS  $[\text{NH}_4^+] = 20.6$  mM, concentration of ammonium in MS medium). At pH 5.5, *cap1-1* growth was inhibited more severely than that of other lines on media with increasing  $\text{NH}_4^+$  levels; while seedlings grew more slowly on higher pH (7.0) medium, inhibition of *cap1-1* growth was more severe than in other lines at high  $\text{NH}_4^+$  levels. Results from one of the three repeated experiments are shown here. Photographs were taken after vertical growth in a growth chamber for 9 d.**
